# Supplementary material for: N-(1,3,4-Oxadiazol-2-yl)Benzamides as Antibacterial Agents against Neisseria gonorrhoeae
Source: PubMed Central journal article supplement (PMC7957578; doi:10.3390/ijms22052427), 2021-02-28

## Supplementary Information:

### ***N*-(1,3,4-oxadiazol-2-yl)benzamides as antibacterial agents against *Neisseria gonorrhoeae***

George A. Naclerio <sup>1</sup>, Nader S. Abutaleb <sup>2</sup>, Marwa Alhashimi <sup>2</sup>, Mohamed N. Seleem <sup>2,3,4</sup>, and Herman O. Sintim <sup>1,4</sup>,

<sup>1</sup> Chemistry Department, Institute for Drug Discovery, Purdue University, West Lafayette, IN 47907, United States; gnacleri@purdue.edu (G.A.N.); hsintim@purdue.edu (H.O.S.)

<sup>2</sup> Department of Comparative Pathobiology, Purdue University College of Veterinary Medicine, West Lafayette, Indiana 47907, United States; nabutale@purdue.edu (N.S.A.); alhashim@purdue.edu (M.A); mseleem@purdue.edu (M.N.S.)

<sup>3</sup> Department of Biomedical Sciences and Pathobiology, Virginia-Maryland College of Veterinary Medicine, Virginia Polytechnic Institute and State University, Blacksburg, VA 24060, United States; seleem@vt.edu (M.N.S)

<sup>4</sup> Purdue Institute of Inflammation, Immunology, and Infectious Disease, West Lafayette, Indiana 47907, United States; mseleem@purdue.edu (M.N.S.); hsintim@purdue.edu (H.O.S.)

### Table of Contents:

I. Description of Bacterial Isolates Used for Study

II. Antibacterial activity of *N*-(1,3,4-oxadiazol-2-yl)benzamides against *N. gonorrhoeae* in presence of serum

III. <sup>1</sup>H, <sup>13</sup>C, and <sup>19</sup>F Spectra of Analogs

## **I. Table S1. Bacterial Isolates Used for Study:**

| <b>Bacterial strains</b>                | <b>Source/Description</b>                                                                                                              |
|-----------------------------------------|----------------------------------------------------------------------------------------------------------------------------------------|
| <i>Neisseria gonorrhoeae</i> 181        | CDC isolate.<br>Resistant to tetracycline and azithromycin.                                                                            |
| <i>Neisseria gonorrhoeae</i> 165        | CDC isolate.<br>Resistant to tetracycline, penicillin, and ciprofloxacin.                                                              |
| <i>Neisseria gonorrhoeae</i> 166        | CDC isolate.<br>Resistant to tetracycline, penicillin, and ciprofloxacin.                                                              |
| <i>Neisseria gonorrhoeae</i> 194        | CDC isolate.<br>Resistant to penicillin, not susceptible to ceftriaxone, cefixime and cefpodoxime.                                     |
| <i>Neisseria gonorrhoeae</i> 197        | CDC isolate.<br>Resistant to tetracycline, penicillin, and ciprofloxacin.                                                              |
| <i>Neisseria gonorrhoeae</i> 200        | CDC isolate.<br>Resistant to tetracycline, penicillin, and ciprofloxacin.                                                              |
| <i>Neisseria gonorrhoeae</i> WHO L      | WHO reference strain.<br>Isolated in Asia, 1996.<br>Resistant to tetracycline, penicillin, and ciprofloxacin.                          |
| <i>Staphylococcus aureus</i> ATCC 25923 | Clinical isolate.<br>Quality control strain for media testing and susceptibility testing.                                              |
| MRSA NRS384 (USA300)                    | Isolated from a wound in Mississippi, USA.<br>Community-acquired MRSA strain.<br>Resistant to erythromycin and tetracycline.           |
| <i>Enterococcus faecalis</i> ATCC 29212 | Isolated from urine.<br>Quality control strain for food testing, media testing and susceptibility testing.                             |
| <i>Enterococcus faecalis</i> ATCC 51575 | Resistant to gentamicin, streptomycin, and vancomycin<br>Sensitive to teichoplanin.<br>Positive for <i>vanB</i>                        |
| <i>Enterococcus faecalis</i> ATCC 51299 | Isolated from peritoneal fluid, Missouri, USA.<br>Resistant to vancomycin.<br>Sensitive to Teicoplanin.<br>Positive for <i>vanB</i>    |
| <i>Enterococcus faecium</i> ATCC 700221 | Isolated from human faeces, Connecticut, USA.<br>Resistant to Vancomycin and Teicoplanin.<br>Positive for <i>vanA</i> .                |
| <i>Escherichia coli</i> BW 25113        | Obtained from the Coli Genetic Stock Center (CGSC), Yale University, USA.<br>Wild-type strain.                                         |
| <i>Escherichia coli</i> JW 55031        | Obtained from the Coli Genetic Stock Center (CGSC), Yale University, USA.<br><i>tolC</i> -mutant. Deficient in AcrAB-TolC efflux pump. |

**II. Table S2.** MICs ( $\mu\text{g/mL}$ ) of **HSGN-235, -237, -238** and control antibiotics against *N. gonorrhoeae* CDC 165 in presence of FBS. The experiment was repeated for 3 independent times.

| <b>Compound/Control Antibiotic</b> | <b>No FBS</b> | <b>1% FBS</b> | <b>5% FBS</b> | <b>10% FBS</b> |
|------------------------------------|---------------|---------------|---------------|----------------|
| <b>HSGN-235</b>                    | 2             | 2             | 4             | 8              |
| <b>HSGN-237</b>                    | 0.06          | 0.125         | 1             | 4              |
| <b>HSGN-238</b>                    | 0.125         | 0.25          | 1             | 1              |
| Azithromycin                       | 1             | 1             | 1             | 2              |
| Tetracycline                       | 4             | 2             | 4             | 4              |

### III. $^1\text{H}$ , $^{13}\text{C}$ , and $^{19}\text{F}$ NMR Spectra of Analogs:

GN-235.1.fid

H1 standard parameters, cryoprobe prodigy.

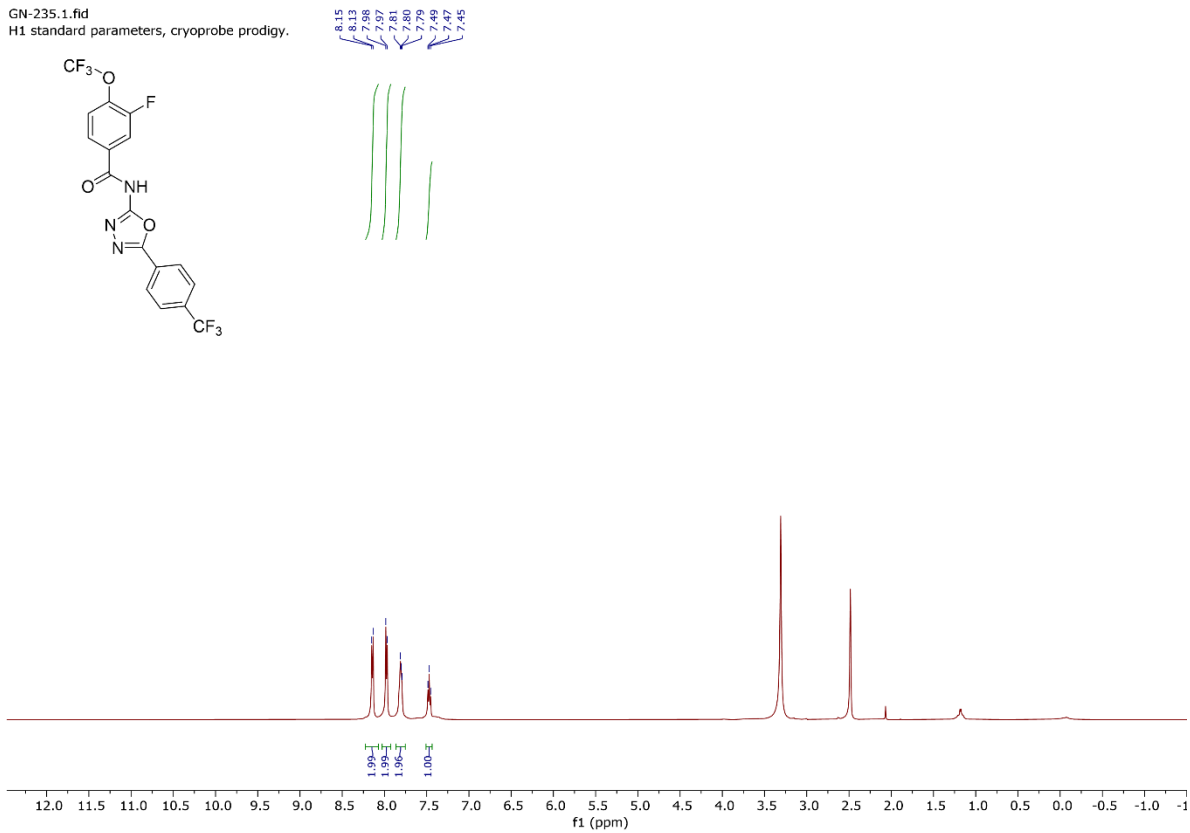

GN-235.1.fid

H1 standard parameters, cryoprobe prodigy.

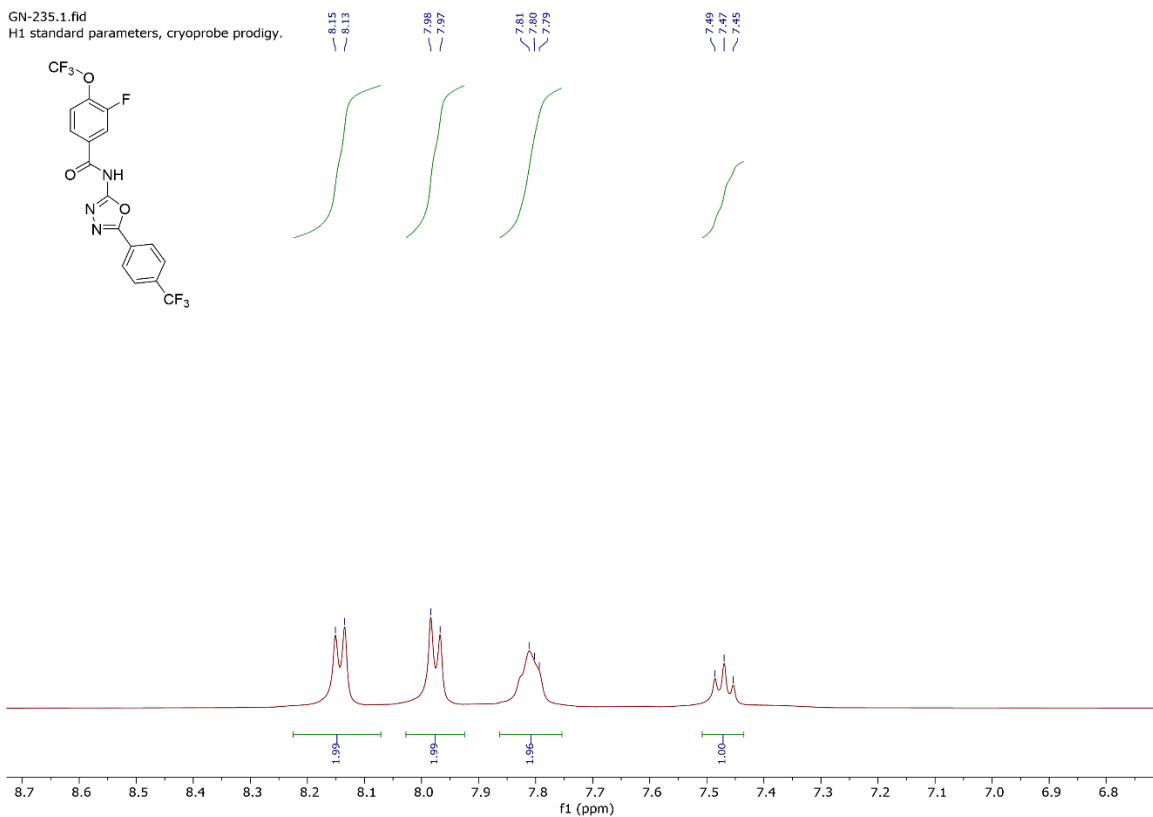

GN-235.2.fid  
C13 standard parameters, cryoprobe prodigy. Pulprog

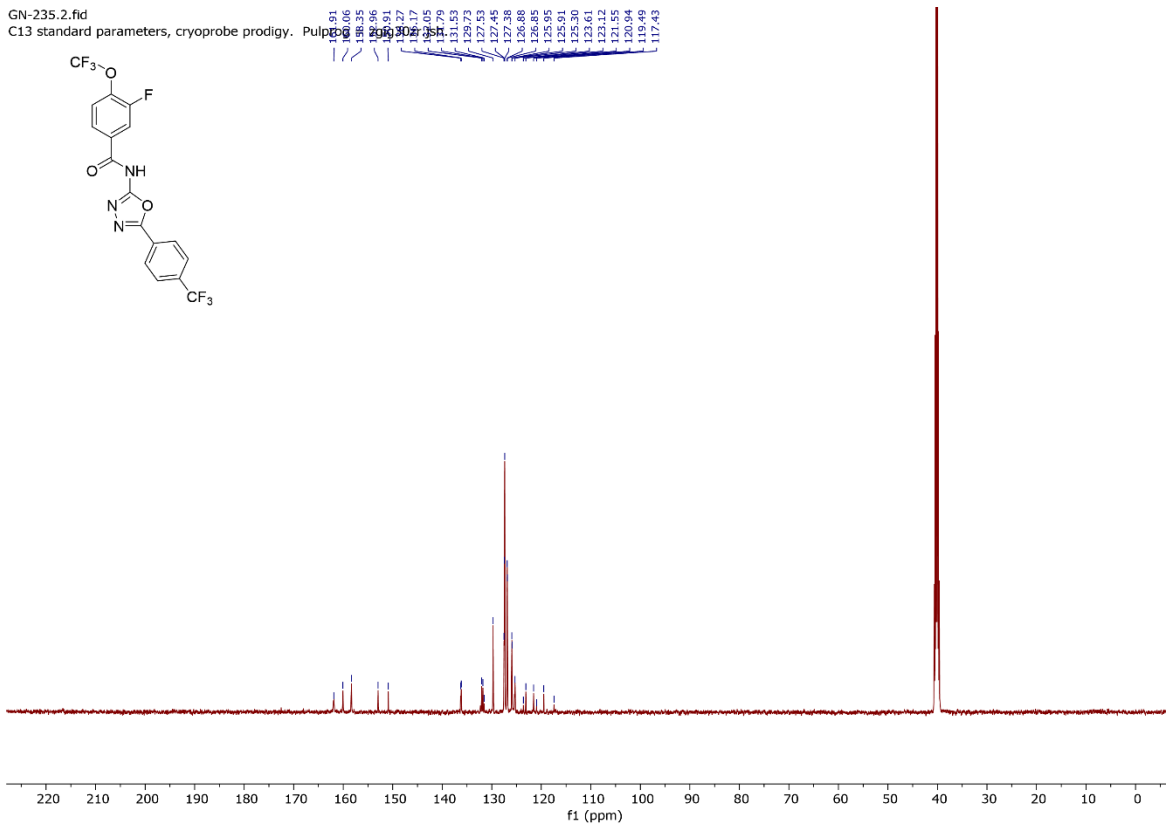

GN-235.3.fid  
F19 standard parameters, cryoprobe prodigy.  
DE is lengthened compared to default.

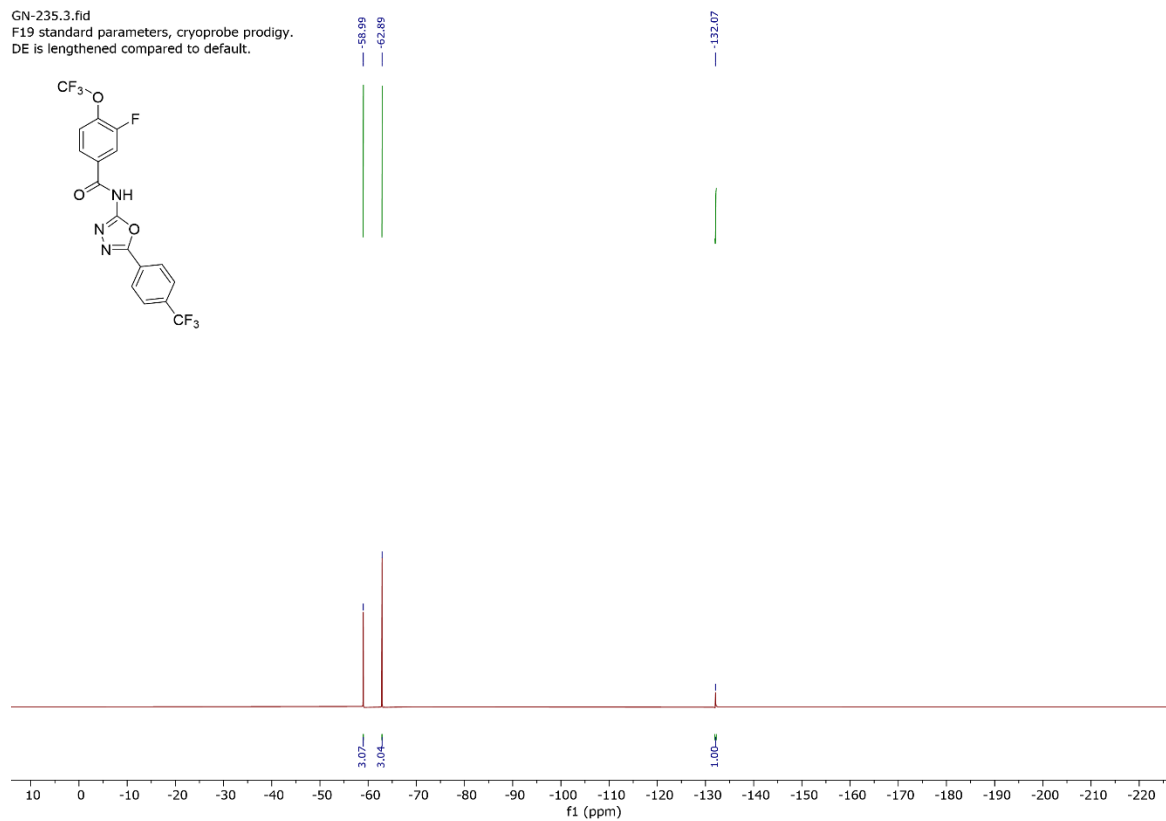

GN-237.1.fid  
H1 standard parameters, cryoprobe prodigy.

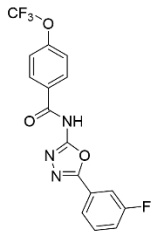

8.17  
8.16  
8.15  
8.14  
7.81  
7.80  
7.79  
7.78  
7.77  
7.72  
7.70  
7.69  
7.68  
7.67  
7.66  
7.65  
7.55  
7.54  
7.51  
7.50  
7.48  
7.47

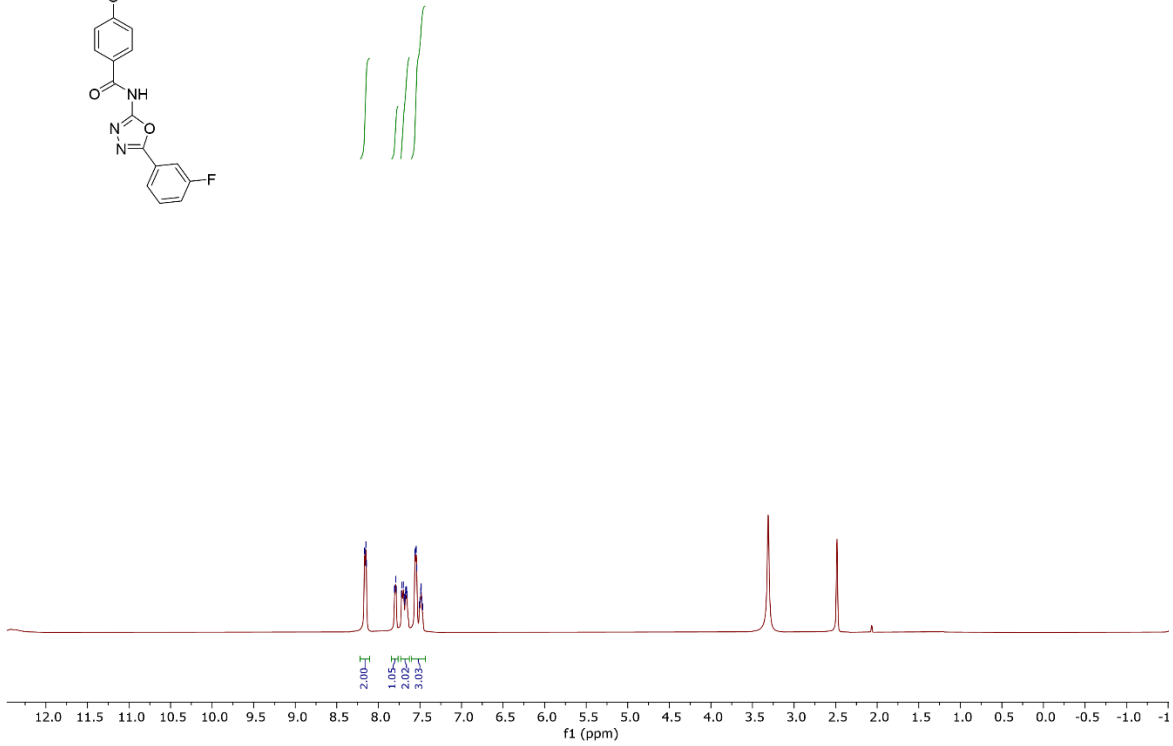

GN-237.1.fid  
H1 standard parameters, cryoprobe prodigy.

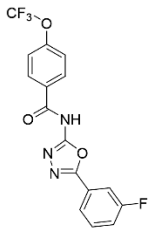

8.17  
8.16  
8.15  
8.14  
7.81  
7.80  
7.79  
7.78  
7.77  
7.72  
7.70  
7.69  
7.68  
7.67  
7.66  
7.65  
7.55  
7.54  
7.51  
7.50  
7.48  
7.47

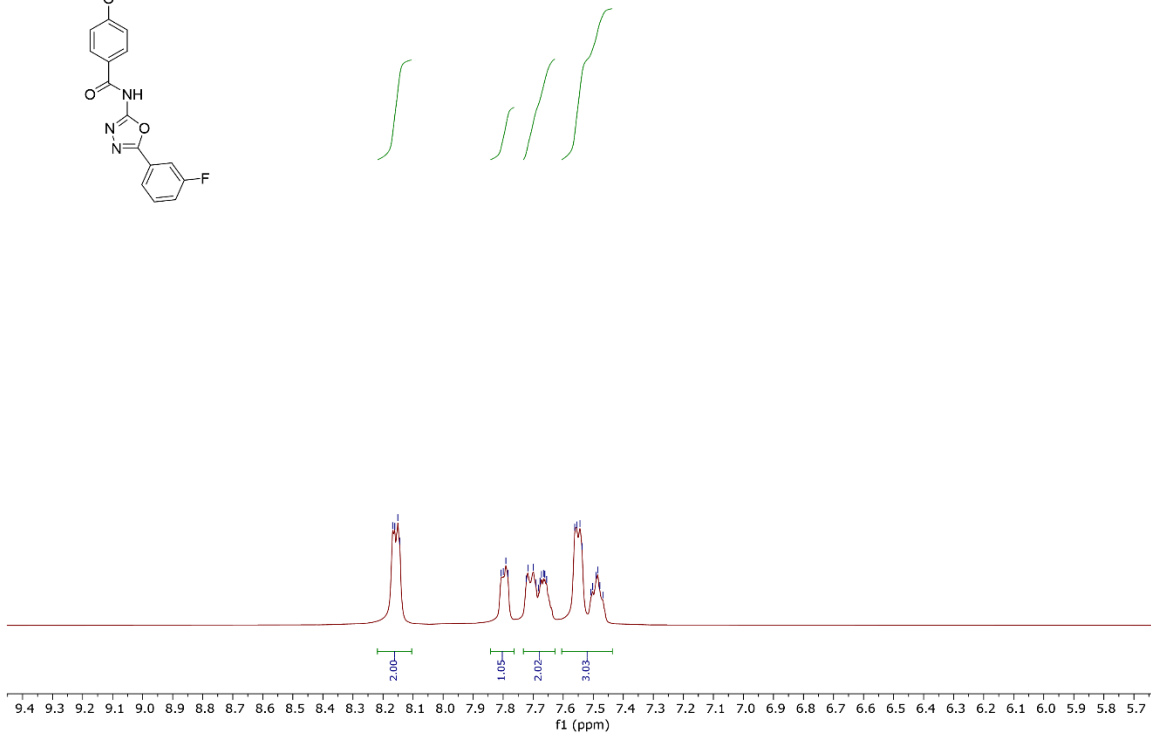

GN-237.2.fid  
C13 standard parameters, cryoprobe prodigy.

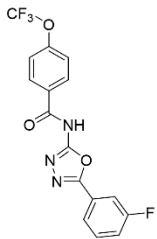

157.03  
157.73  
157.78  
158.16  
158.85  
158.86  
133.36  
133.29  
132.17  
132.11  
125.82  
125.85  
123.50  
122.81  
121.46  
121.11  
119.74  
119.76  
119.09  
117.35  
113.34  
113.15

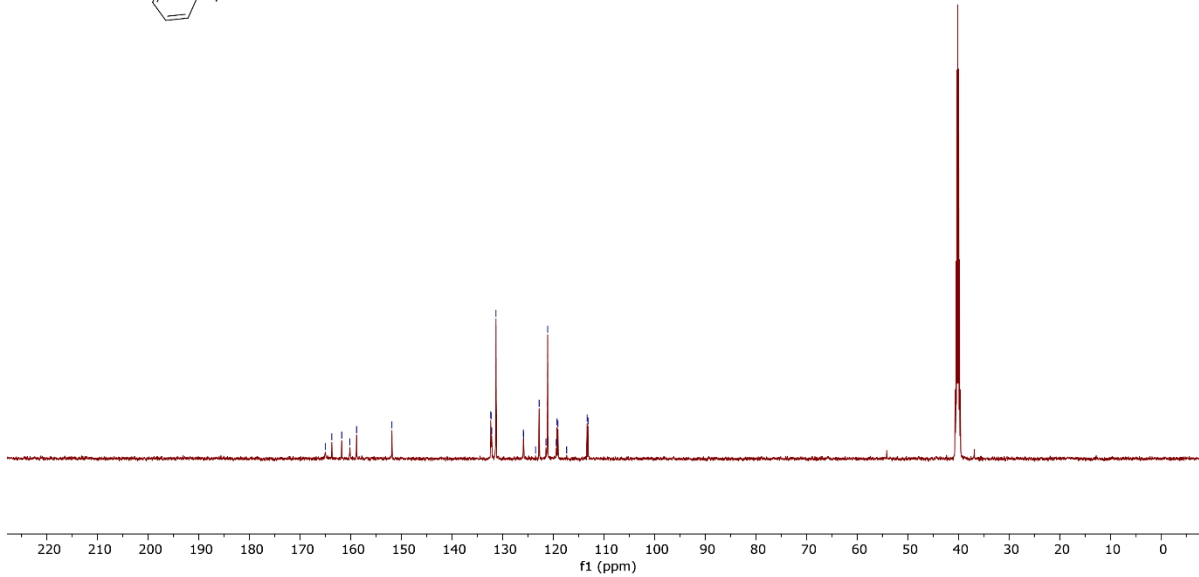

GN-237.3.fid  
F19 standard parameters, cryoprobe prodigy.  
DE is lengthened compared to default.

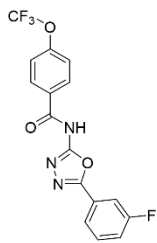

57.79  
112.48  
112.49  
112.51  
112.53

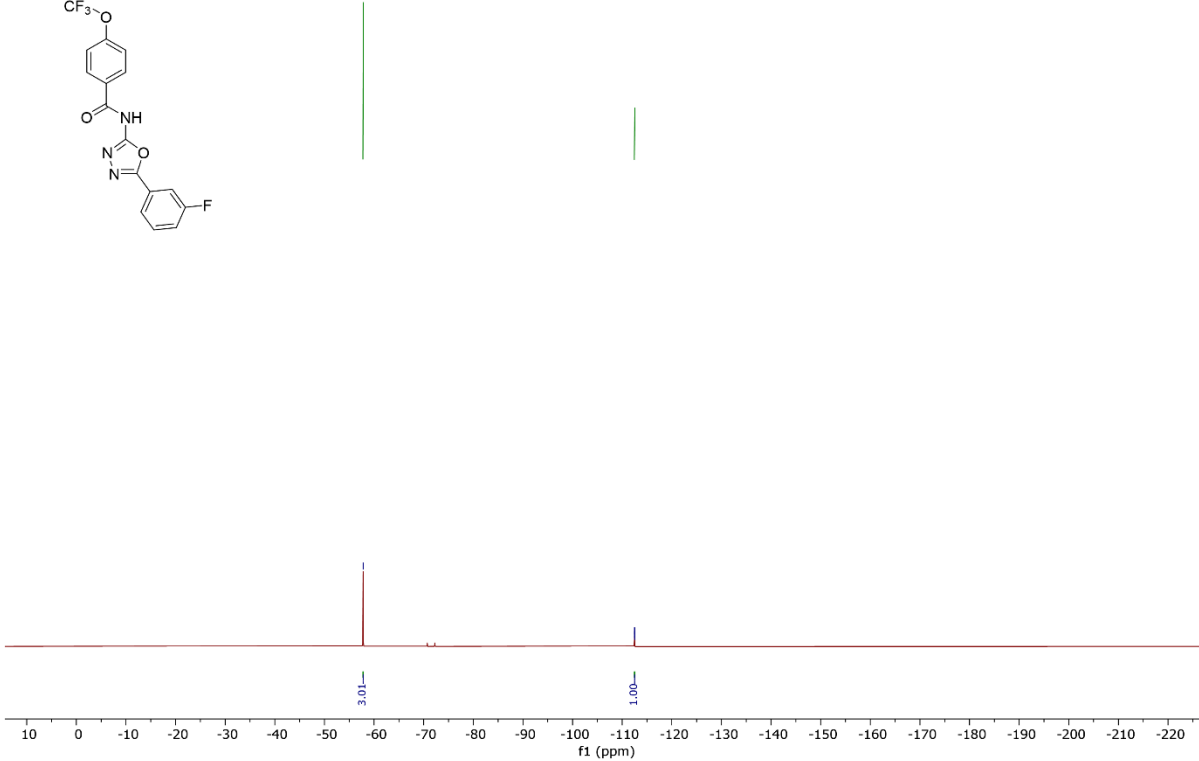

GN-238.1.fid  
H1 standard parameters, cryoprobe prodigy.

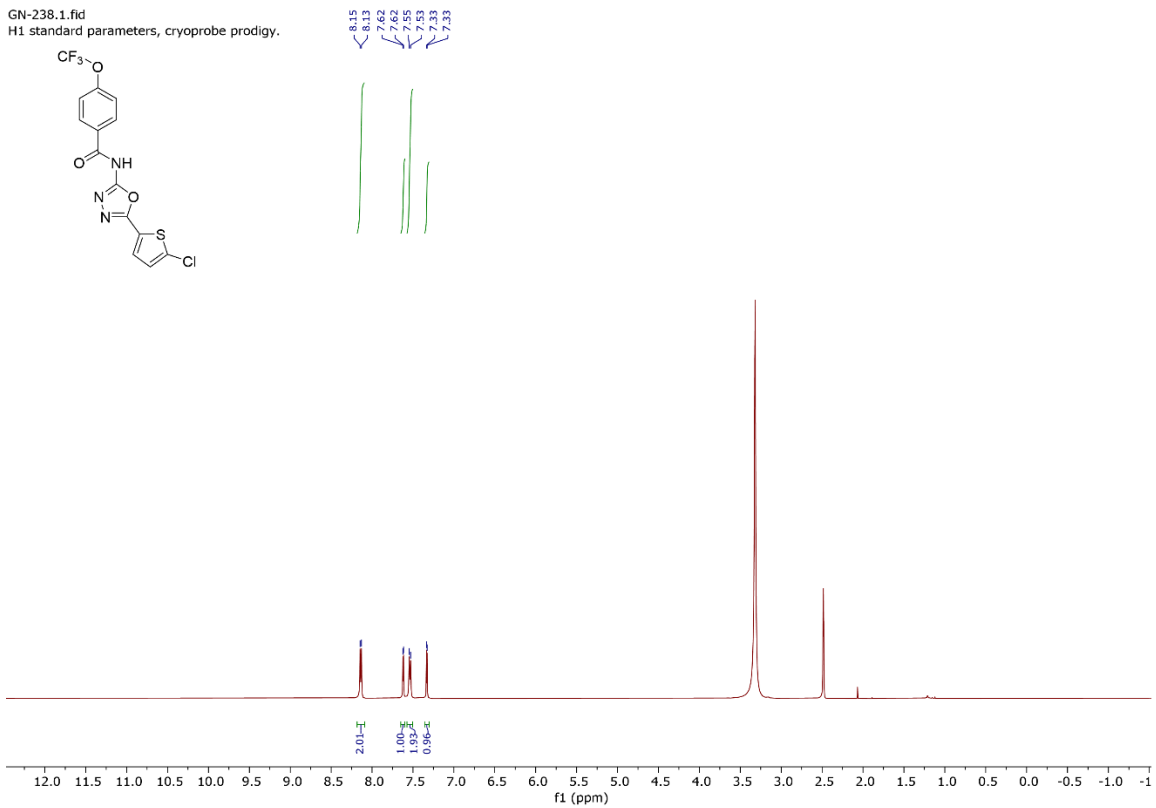

GN-238.1.fid  
H1 standard parameters, cryoprobe prodigy.

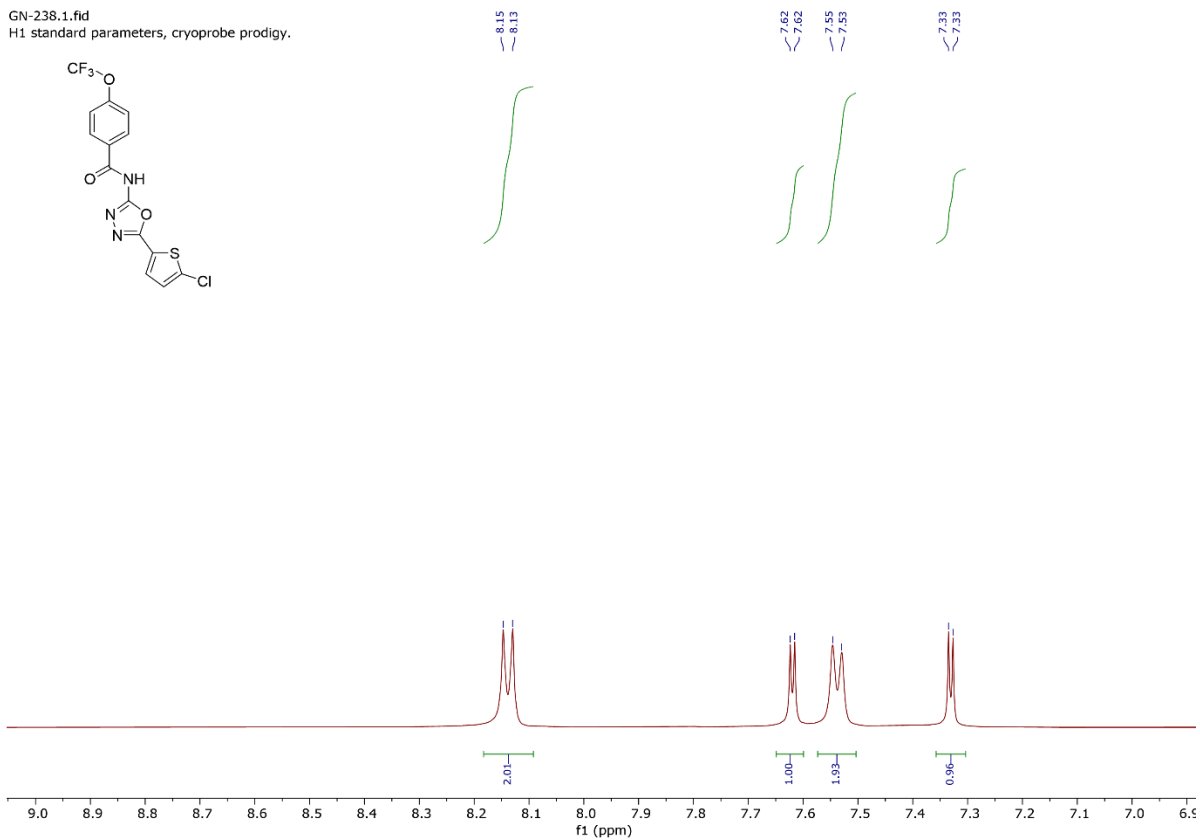



GN-238.2.fid  
C13 standard parameters, cryoprobe prodigy. P:\prodigy30zr.jsh

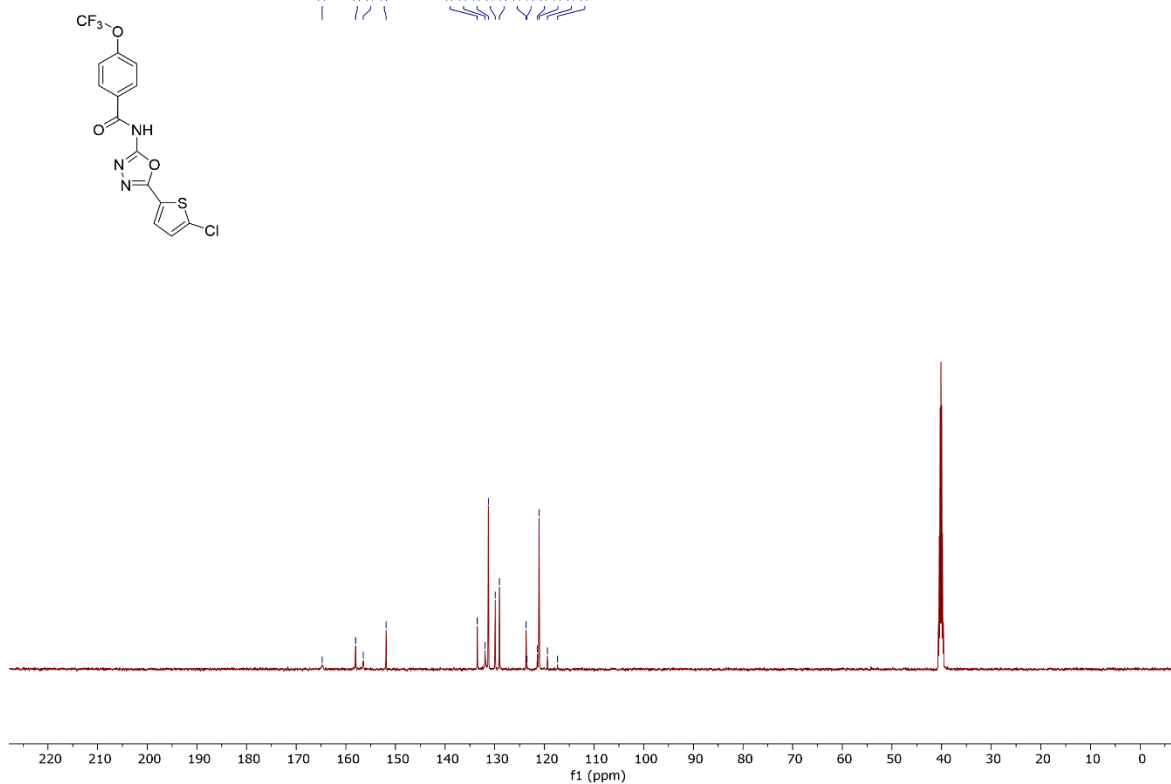

GN-238.3.fid  
F19 standard parameters, cryoprobe prodigy.  
DE is lengthened compared to default.

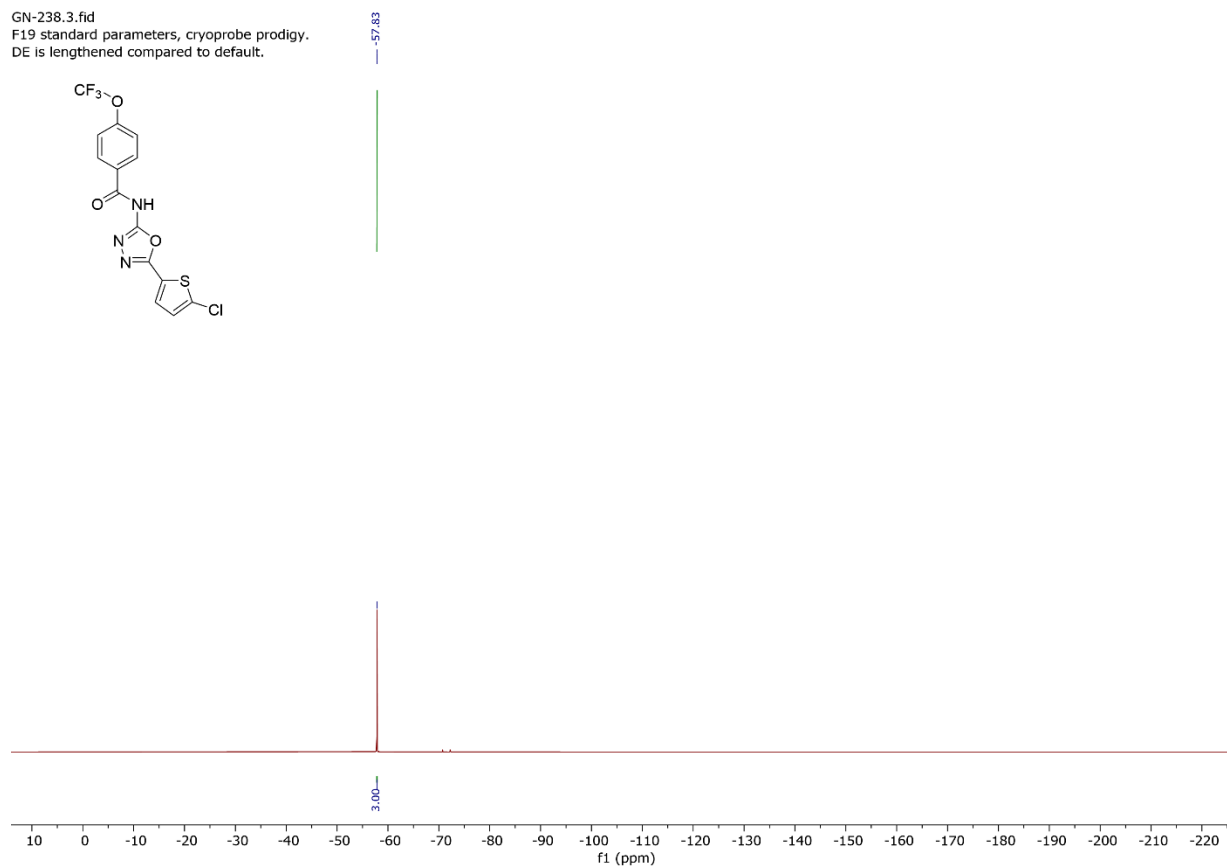

Supplement: ijms-22-02427-s001.pdf [file ijms-22-02427-s001.pdf]
